# Supplementary material
Source: PubMed Central journal article supplement (PMC8916416)
Supplement: mmc1.pdf [file mmc1.pdf]

---

protranslate

This letter is written to confirm that the article titled “**Determining the Relationship Between Loneliness and Internet Addiction Among Adolescents During the Covid-19 Pandemic in Turkey**” belonging to **Arzu Sarıliođlu** has been translated and edited by our language professionals.

Best regards,

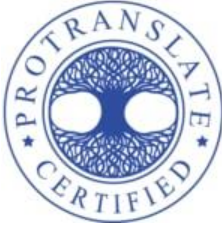

**PROTRANSLATE**  
TRANSLATION SERVICES  
www.protranslate.net  
+90 850 532 1620  
info@protranslate.net  
• Certified Translation •

**Adres:** Mehmet Akif Caddesi No.14 Köşklüçiftlik, Lefkoşa, Kıbrıs  
**Telefon:** +90 (850)532 16 20

info@protranslate.net  
www.protranslate.net

---
